# Supplementary material for: Designed Polyurethanes for Potential Biomedical and Pharmaceutical Applications: Novel Synthetic Strategy for Preparing Sucrose Containing Biocompatible and Biodegradable Polyurethane Networks
Source: PubMed Central journal article supplement (PMC6587335; doi:10.3390/polym11050825), 2019-05-07
Supplement: polymers-11-00825-s001.pdf [file polymers-11-00825-s001.pdf]

# Supplementary Materials for

## Designed Polyurethanes for Potential Biomedical and Pharmaceutical Applications: Novel Synthetic Strategy for Preparing Sucrose Containing Biocompatible and Biodegradable Polyurethane Networks

Lajos Nagy<sup>1</sup>, Miklós Nagy<sup>1</sup>, Bence Vadkerti<sup>1</sup>, Lajos Daróczy<sup>2</sup>, György Deák<sup>1</sup>, Miklós Zsuga<sup>1</sup>, Sándor Kéki<sup>1\*</sup>

<sup>1</sup>Department of Applied Chemistry, Faculty of Science and Technology, University of Debrecen, Egyetem tér 1, H-4032 Debrecen, Hungary;  
nagy.lajos@science.unideb.hu (L.N.); miklos.nagy@science.unideb.hu (M.N.);  
bencevadkerti94@gmail.com (B.V.); deak.gyorgy@science.unideb.hu (G.D.);  
zsuga.miklos@science.unideb.hu (M.Z.)

<sup>2</sup>Department of Solid State Physics, Faculty of Science and Technology, University of Debrecen, Bem tér 18/b, H-4026 Debrecen, Hungary  
daroczy.lajos@science.unideb.hu (L.D.);

\*Correspondence: keki.sandor@science.unideb.hu (S.K.); Tel: +36-52-512-900 (ext. 22455)

### Table of Contents

|                                                                                                                                                        |   |
|--------------------------------------------------------------------------------------------------------------------------------------------------------|---|
| <b>Table S1.</b> The $A$ , $k$ , and $\gamma$ parameters obtained by fitting of the KEKAM model to the experimental data. ....                         | 2 |
| <b>Figure S1:</b> The stress-strain ( $\sigma$ - $\varepsilon$ ) curve for the SPUR-1 sample.....                                                      | 3 |
| <b>Figure S2:</b> The stress-strain ( $\sigma$ - $\varepsilon$ ) curve for the SPUR-3 sample.....                                                      | 3 |
| <b>Figure S3:</b> The stress-strain ( $\sigma$ - $\varepsilon$ ) curve for the SPUR-4 sample.....                                                      | 4 |
| <b>Figure S4:</b> DSC trace for the SPUR-1 sample ( $T_g = -58$ °C, and $T_m = 27$ °C).....                                                            | 4 |
| <b>Figure S5:</b> DSC trace for the SPUR-2 sample ( $T_g = -58$ °C, and $T_m = 27$ °C).....                                                            | 5 |
| <b>Figure S6:</b> DSC trace for the SPUR-4 sample ( $T_g = -52$ °C, and $T_m = 30$ °C).....                                                            | 5 |
| <b>Figure S7:</b> DSC trace for the SPUR-5 sample ( $T_g = -51$ °C, and $T_m = 23$ °C).....                                                            | 6 |
| <b>Figure S8:</b> DMA trace (variation of the storage modulus ( $E'$ ) with the temperature in the range of -60 - +180 °C) for the SPUR-1 sample ..... | 6 |
| <b>Figure S9:</b> DMA trace (variation of the storage modulus ( $E'$ ) with the temperature in the range of -60 - +180 °C) for the SPUR-2 sample ..... | 7 |

**Table S1.** The  $A$ ,  $k$ , and  $\gamma$  parameters obtained by fitting of the KEKAM model to the experimental data.

| Sample |            | n-Hexane   | Toluene    | Acetone    | DMSO       | Methanol   | Water      |
|--------|------------|------------|------------|------------|------------|------------|------------|
| SPUR-1 | $A =$      | 5.6(0.1)   | 286(4)     | 397(4)     | 1040(9)    | 78(1)      | 15(7)      |
|        | $k =$      | 0.80(0.03) | 0.70(0.04) | 0.39(0.01) | 0.15(0.01) | 1.65(0.17) | 0.07(0.04) |
|        | $\gamma =$ | 0.99(0.05) | 0.61(0.03) | 0.76(0.02) | 0.87(0.01) | 0.91(0.18) | 0.44(0.1)  |
| SPUR-2 | $A =$      | 6.3(0.3)   | 310(5)     | 396(1)     | 963(12)    | 72(0.8)    | -*         |
|        | $k =$      | 0.22(0.03) | 0.36(0.03) | 0.96(0.02) | 0.16(0.01) | 0.88(0.07) | -          |
|        | $\gamma =$ | 0.93(0.20) | 0.47(0.03) | 0.80(0.03) | 0.99(0.06) | 0.93(0.10) | -          |
| SPUR-3 | $A =$      | -*         | 268(2)     | 251(7)     | 503(19)    | 50(1)      | -*         |
|        | $k =$      | -          | 0.28(0.01) | 0.27(0.02) | 0.10(0.01) | 0.35(0.01) | -          |
|        | $\gamma =$ | -          | 0.84(0.01) | 0.74(0.04) | 0.81(0.03) | 0.81(0.01) | -          |
| SPUR-4 | $A =$      | 6(1)       | 254(1)     | 250(1)     | 344(2)     | 66(1)      | 3(1)       |
|        | $k =$      | 0.25(0.01) | 0.65(0.01) | 0.49(0.01) | 0.18(0.01) | 0.68(0.02) | 0.33(0.06) |
|        | $\gamma =$ | 0.72(0.03) | 0.89(0.02) | 0.84(0.01) | 0.88(0.02) | 0.88(0.40) | 0.52(0.07) |
| SPUR-5 | $A =$      | 4(1)       | 156(1)     | 140(1)     | 268(2)     | 46(1)      | -*         |
|        | $k =$      | 0.16(0.01) | 0.80(0.05) | 0.80(0.06) | 0.88(0.01) | 0.52(0.01) | -          |
|        | $\gamma =$ | 1.03(0.07) | 0.76(0.05) | 0.63(0.04) | 0.82(0.01) | 0.82(0.02) | -          |

\*The swelling ratio in these cases were so low that the model could not be fitted unambiguously.

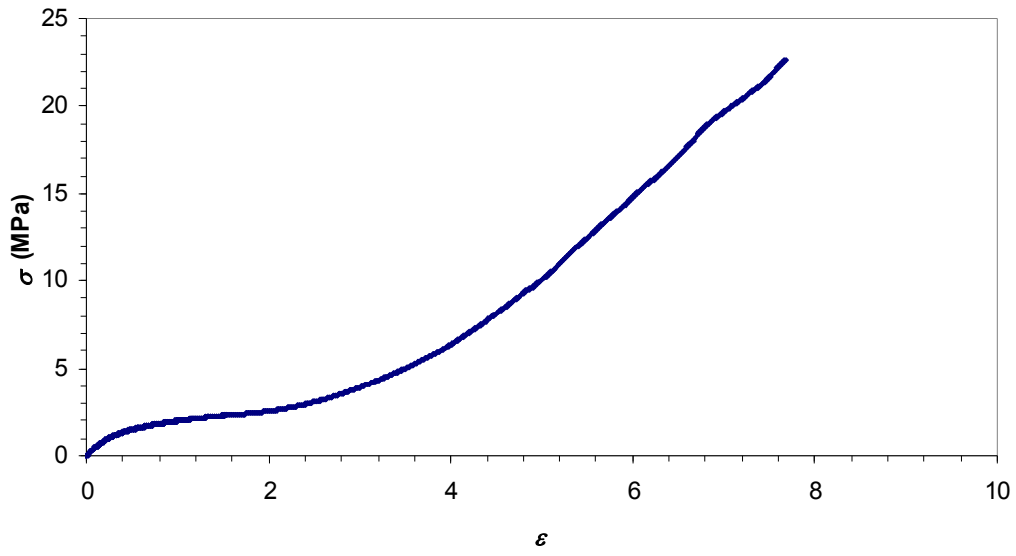

**Figure S1:** The stress-strain ( $\sigma$ - $\epsilon$ ) curve for the SPUR-1 sample

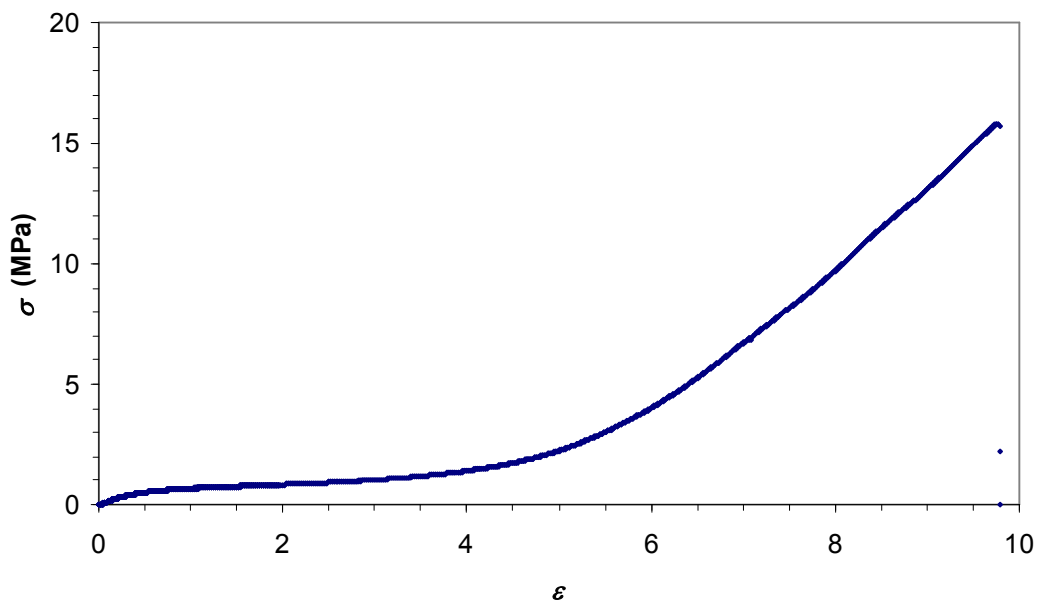

**Figure S2:** The stress-strain ( $\sigma$ - $\epsilon$ ) curve for the SPUR-3 sample

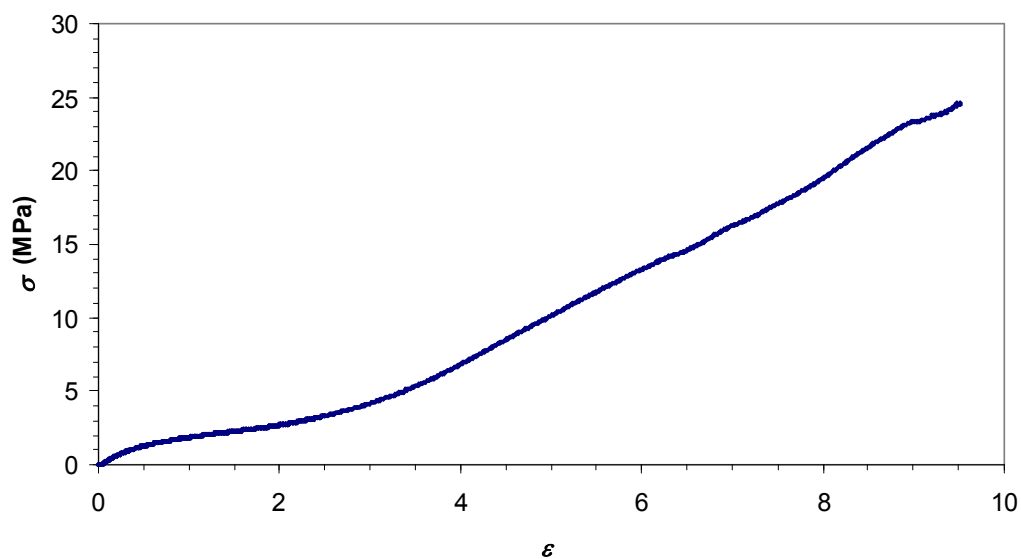

**Figure S3:** The stress-strain ( $\sigma$ - $\epsilon$ ) curve for the SPUR-4 sample

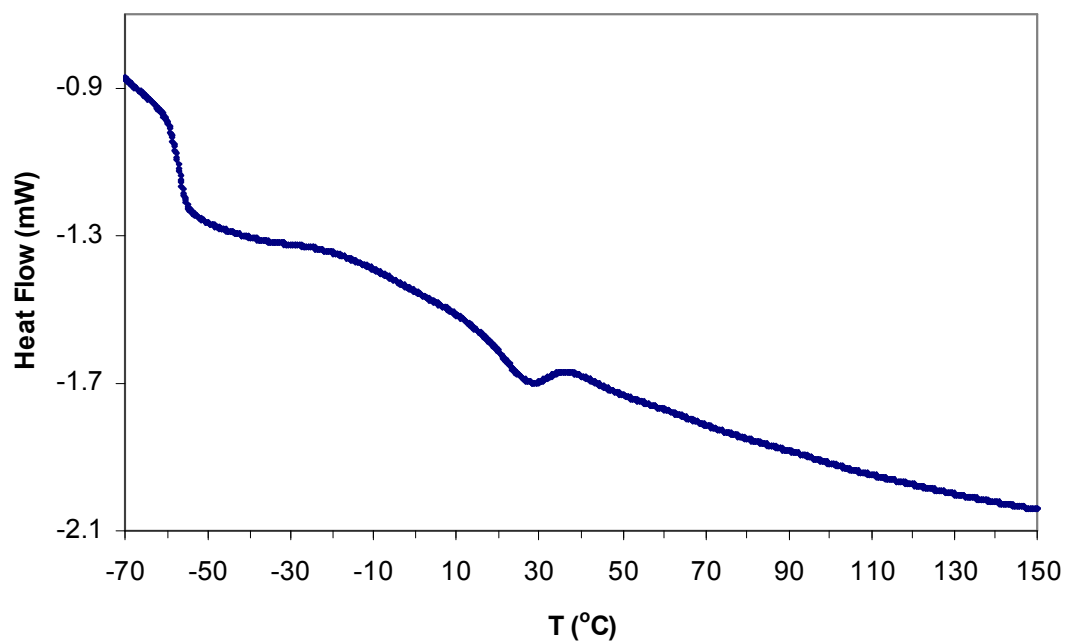

**Figure S4:** DSC trace for the SPUR-1 sample ( $T_g = -58^{\circ}\text{C}$ , and  $T_m = 27^{\circ}\text{C}$ )

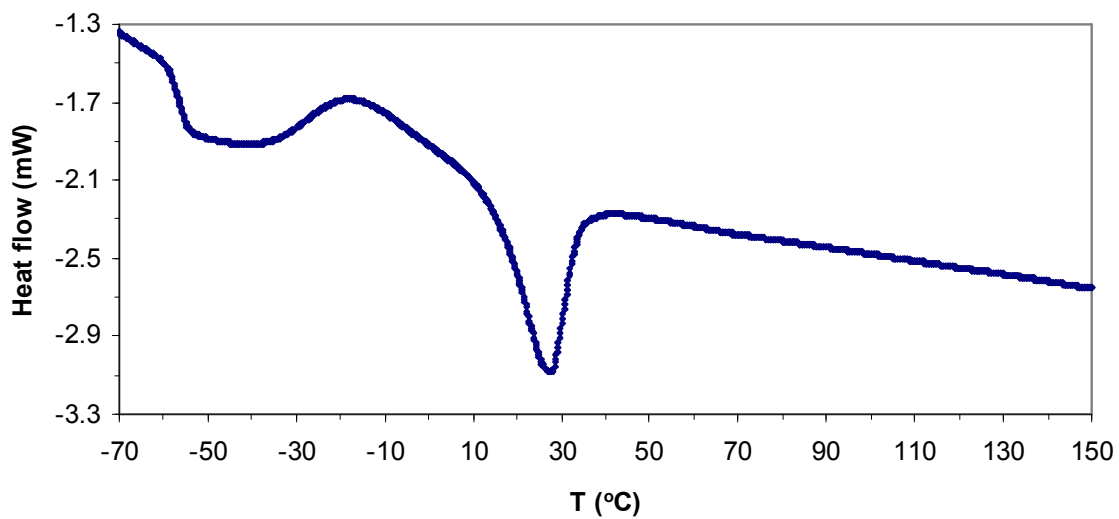

**Figure S5:** DSC trace for the SPUR-2 sample ( $T_g = -58\text{ }^\circ\text{C}$ , and  $T_m = 27\text{ }^\circ\text{C}$ )

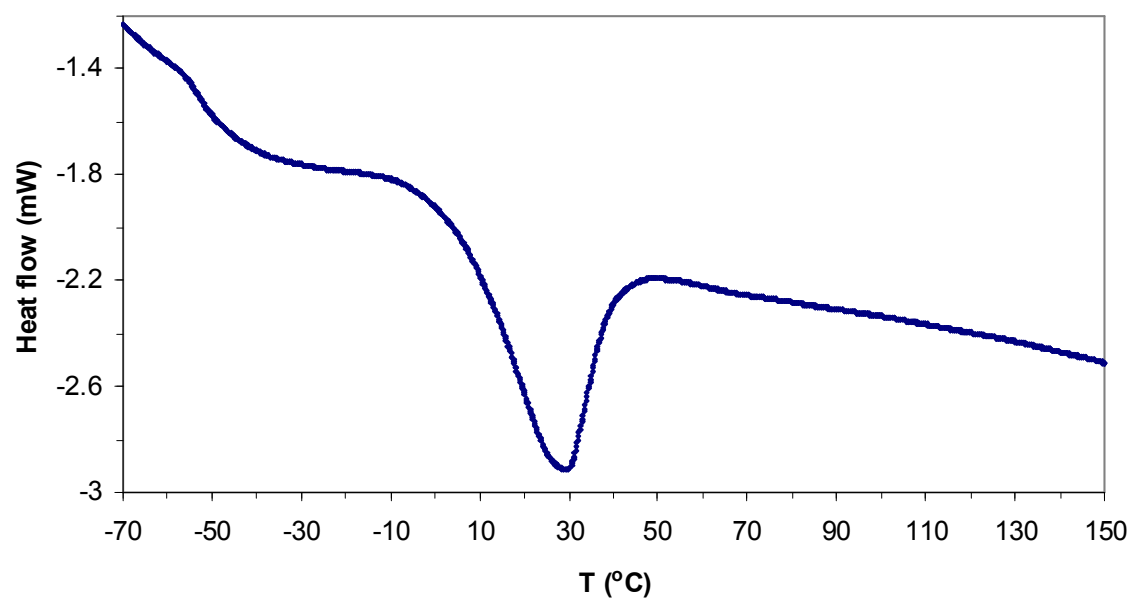

**Figure S6:** DSC trace for the SPUR-4 sample ( $T_g = -52\text{ }^\circ\text{C}$ , and  $T_m = 30\text{ }^\circ\text{C}$ )

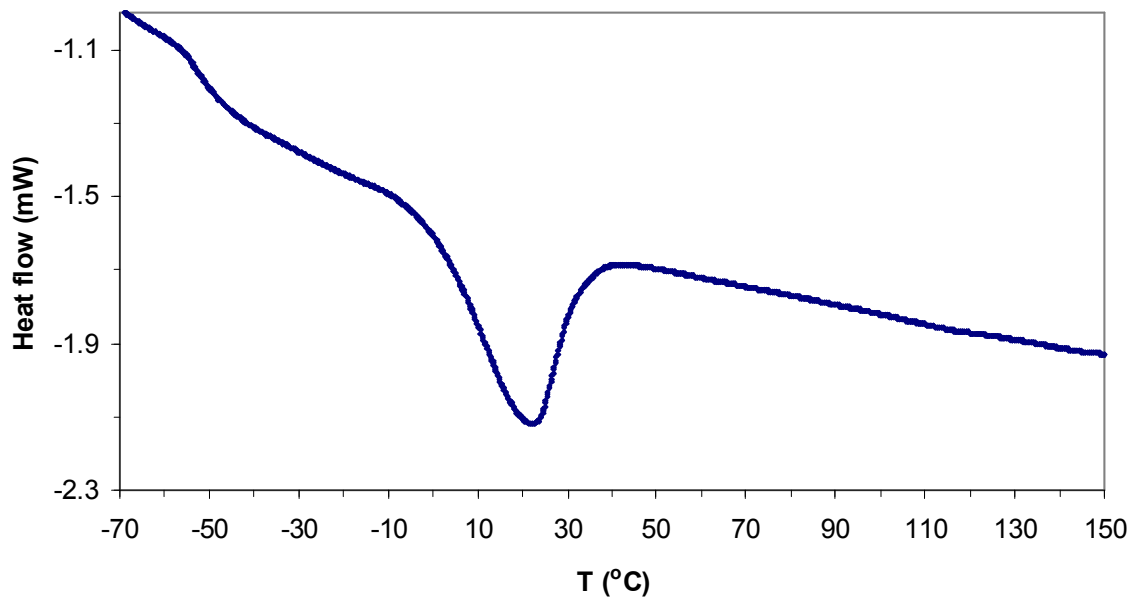

**Figure S7:** DSC trace for the SPUR-5 sample ( $T_g = -51\text{ }^\circ\text{C}$ , and  $T_m = 23\text{ }^\circ\text{C}$ )

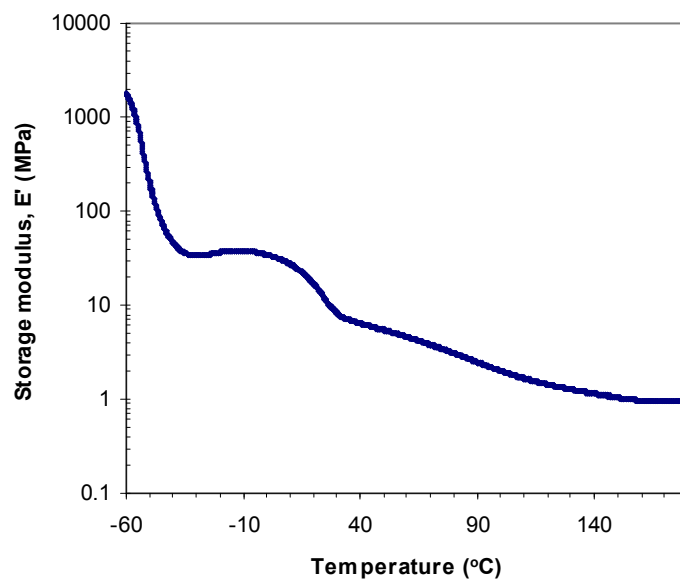

**Figure S8:** DMA trace (variation of the storage modulus ( $E'$ ) with the temperature in the range of  $-60 - +180\text{ }^\circ\text{C}$ ) for the SPUR-1 sample

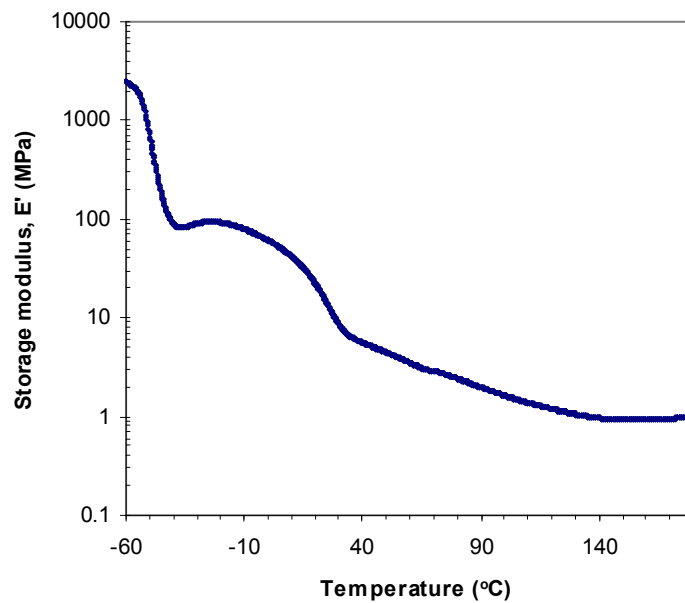

**Figure S9:** DMA trace (variation of the storage modulus ( $E'$ ) with the temperature in the range of  $-60 - +180$  °C) for the SPUR-2 sample
